# Supplementary material for: siRNA Nanoparticle Targeting PD-L1 Activates Tumor Immunity and Abrogates Pancreatic Cancer Growth in Humanized Preclinical Model
Source: MDPI journal article supplement (doi:10.3390/cells10102734), 2021-10-13
Supplement: s1 [file s1]

# Supplementary Material for

siRNA nanoparticle targeting PD-L1 activates tumor immunity and abrogates pancreatic cancer growth in humanized, orthotopic preclinical model

- This file contains 6 supplementary figures and 1 supplementary table.

Supplementary Figure 1

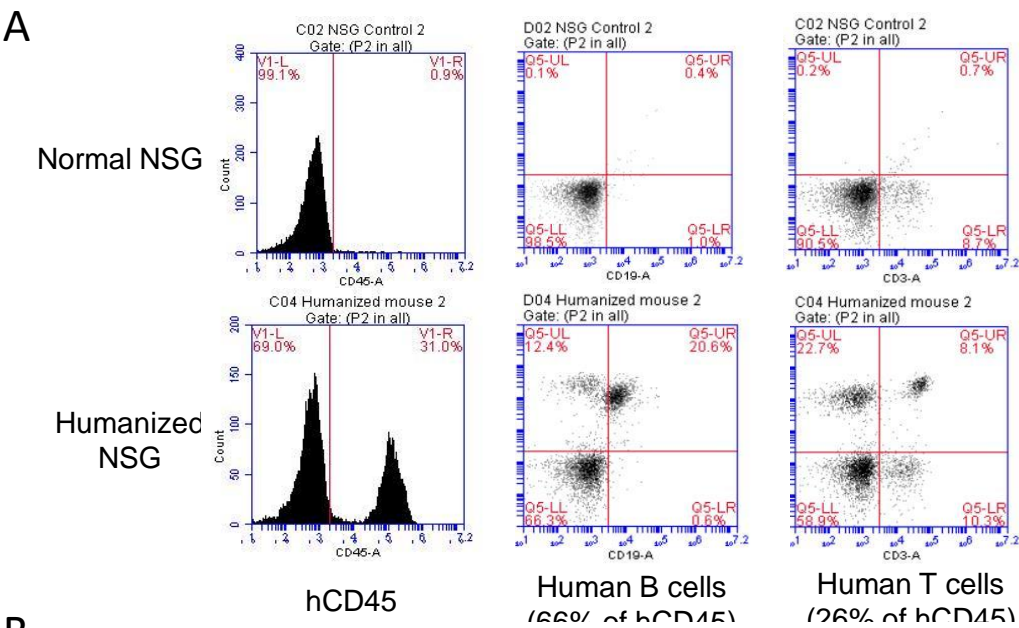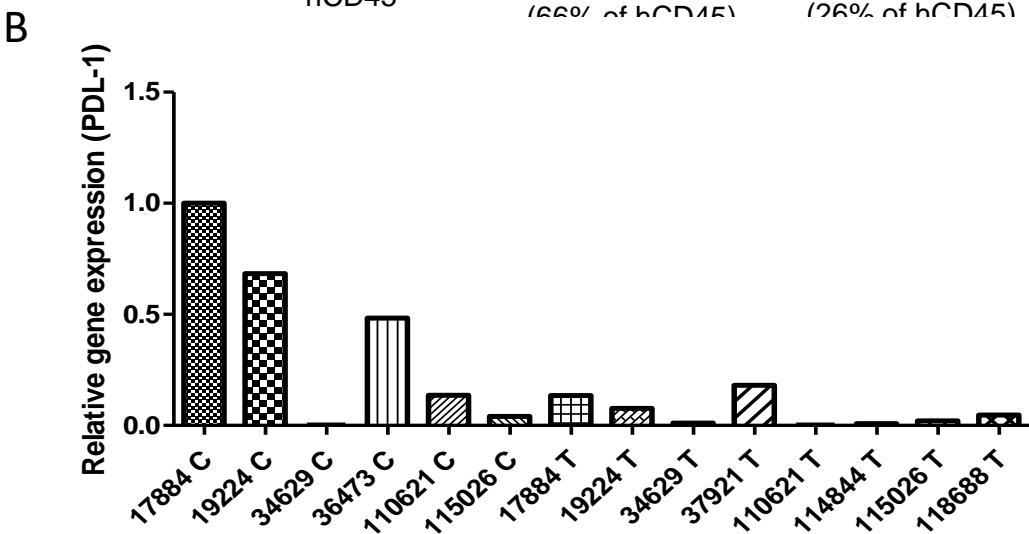

**Figure S1.** A. Representative flow cytometry plots showing human hematopoietic cells (hCD45<sup>+</sup>), human T lymphocytes (hCD45<sup>+</sup>hCD3<sup>+</sup>) and human B lymphocytes (hCD45<sup>+</sup>hCD19<sup>+</sup>) in the blood of humanized normal mice. B. Expression profile of PDAC primary cells (marked as C) and tumors (marked as T).

Supplementary Figure 2

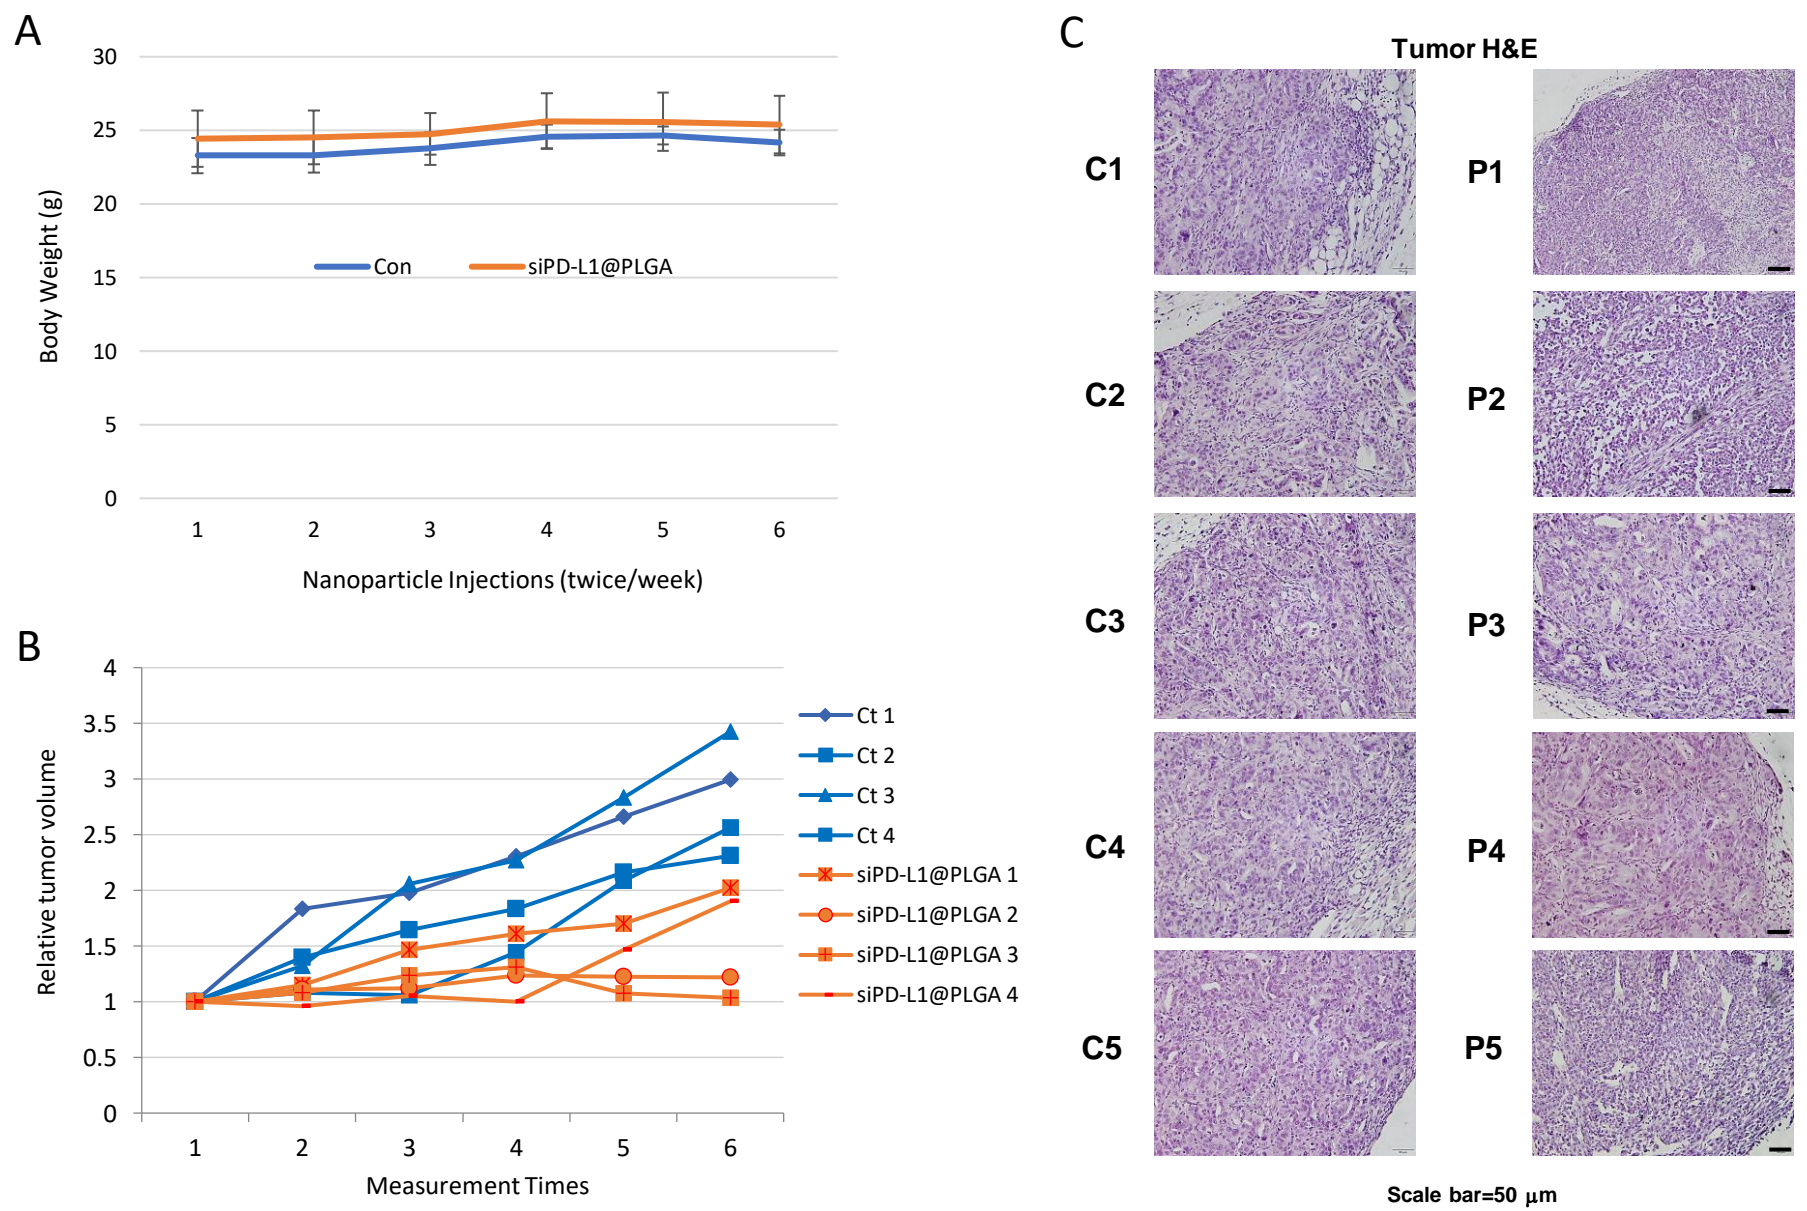

**Figure S2.** A. Graph for the body weight changes during the siPD-L1@PLGA treatment (in orange). B. Relative tumor volume of the individual mouse of control group (in blue) or siPD-L1@PLGA treated group (in orange). C. H&E staining of each tumor

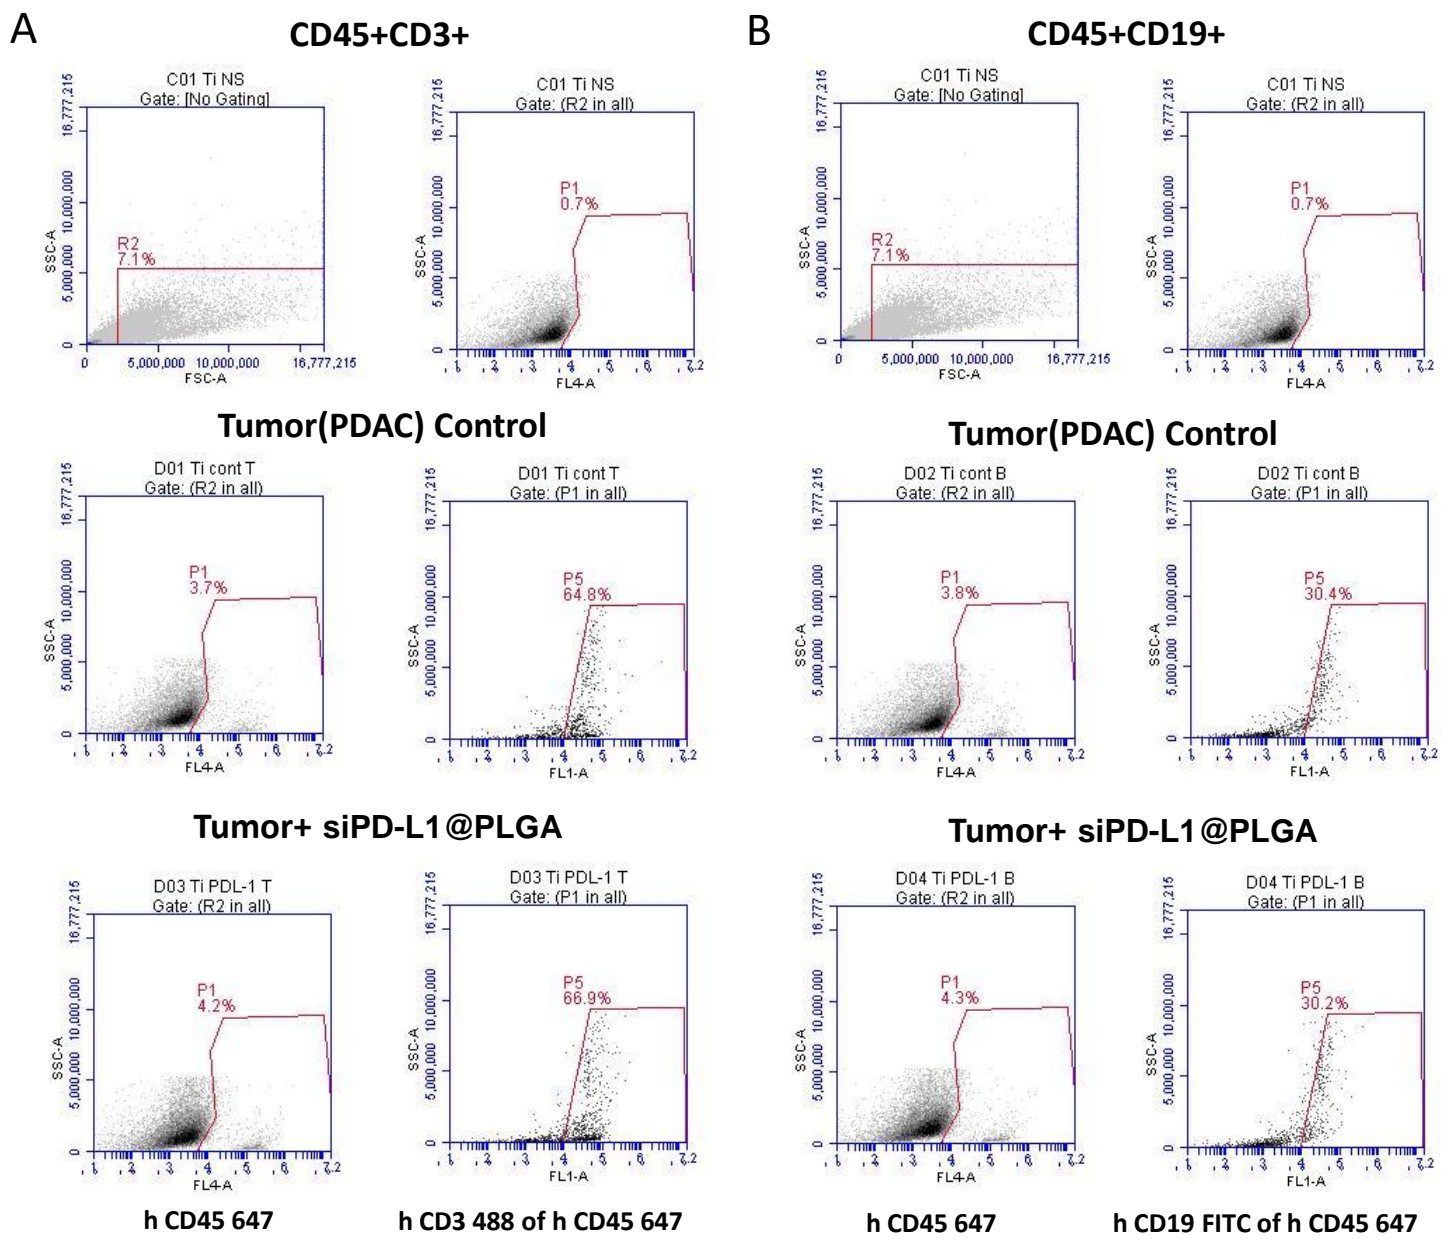

**Figure S3.** Representative flow cytometry plots and gatings for the tumor infiltrated immune cell analysis. Panels in A represent the gating for Cd45+Cd3+ cells, whereas panels in B represent Cd45+Cd19+ cells.

Supplementary Figure 4

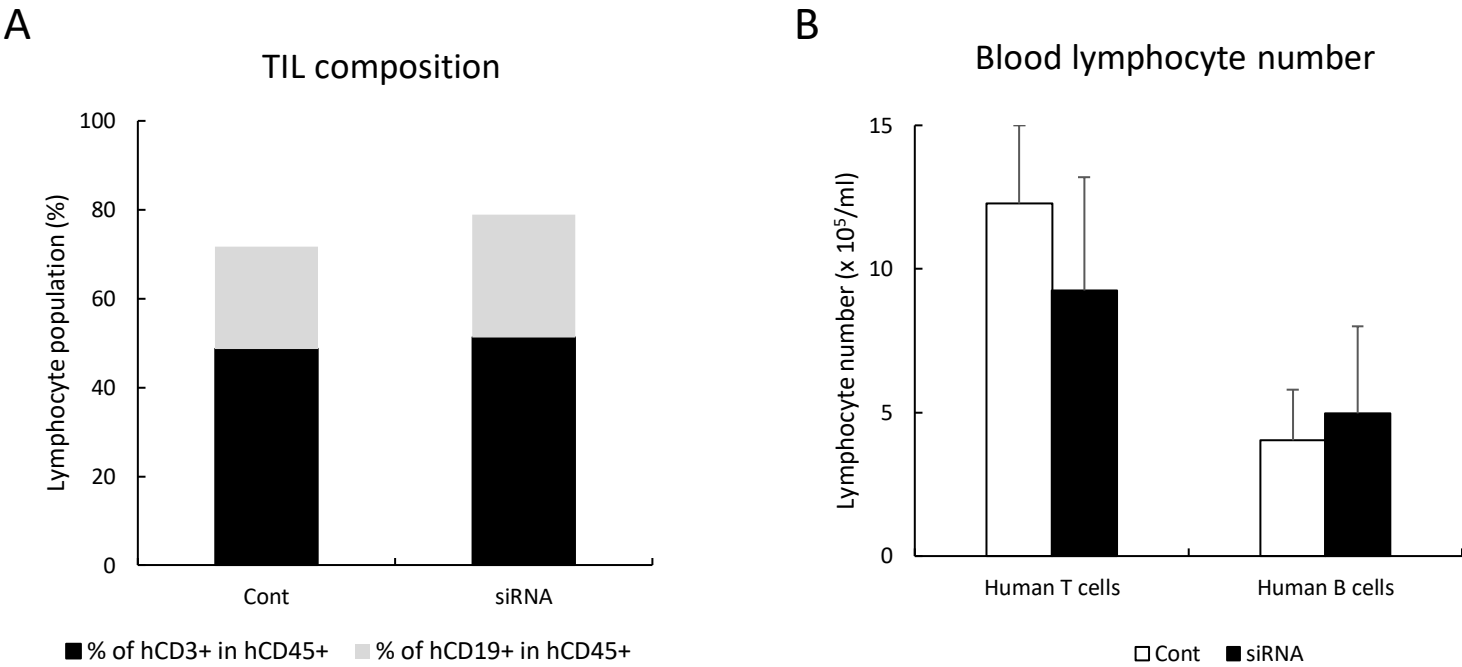

**Figure S4.** Human lymphocyte composition in tumor (A) and human lymphocyte count in the blood (B) of humanized NSG mice bearing PDAC tumors treated with vehicle or nano-PD-L1 siRNA. hCD45<sup>+</sup>hCD3<sup>+</sup> and hCD45<sup>+</sup>hCD19<sup>+</sup> represent human T lymphocytes and human B lymphocytes, respectively. Data are expressed as the mean  $\pm$  SE (n=4-5 mice/group).



# Supplementary Figure 5

A

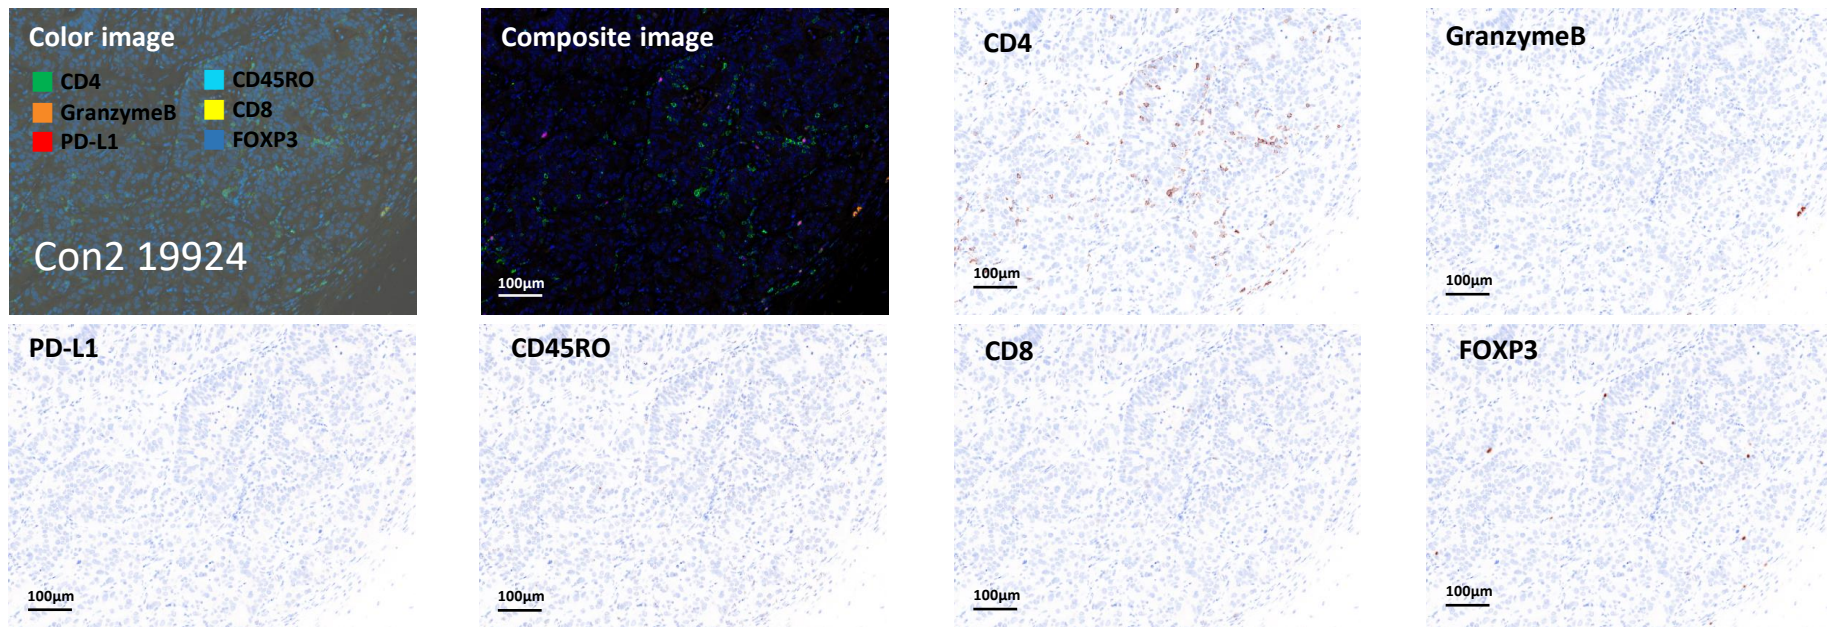

B

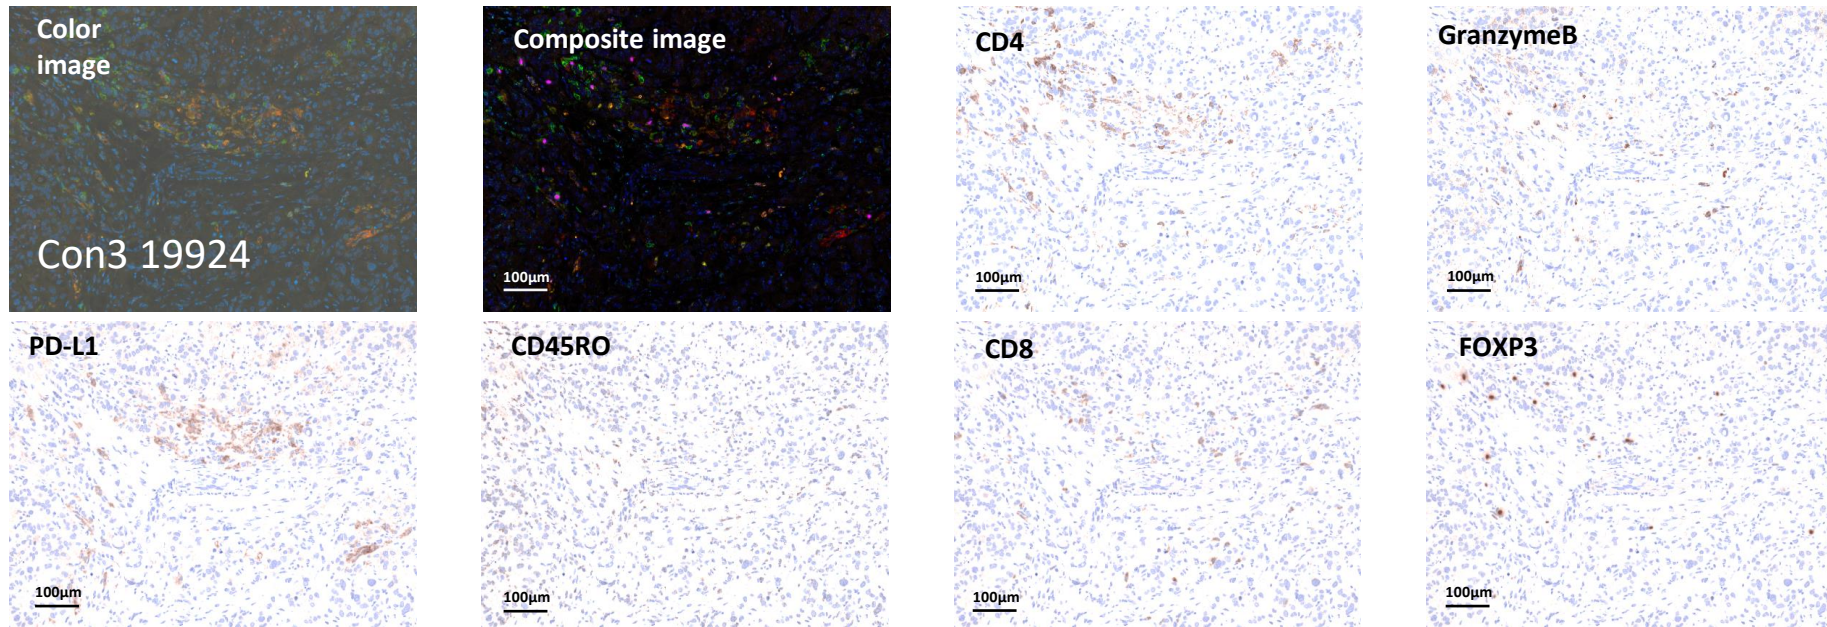

**Figure S5.** Raw data of OPAL images shown in Figure 5B and 5C. (A-D) present control tumors and (E-H) present siPD-L1 @PLGA treated tumors



# Supplementary Figure 5

C

CD4  
GranzymeB  
PD-L1  
CD45RO  
CD8  
FOXP3

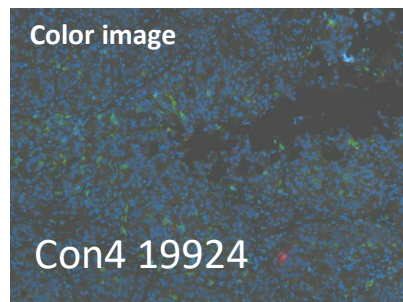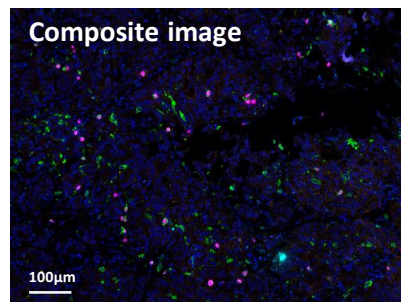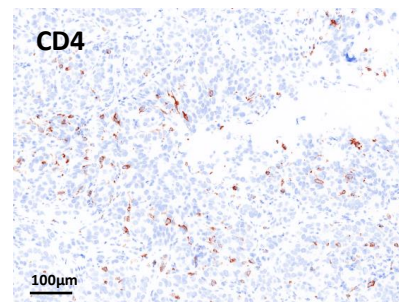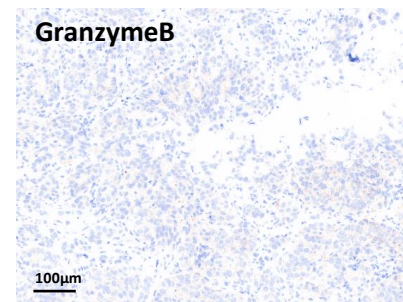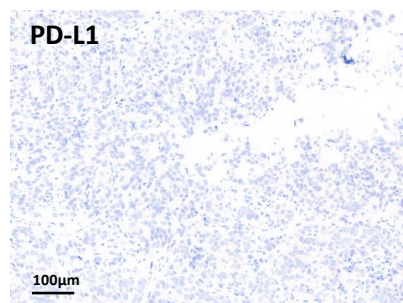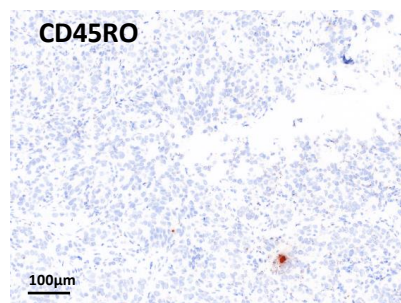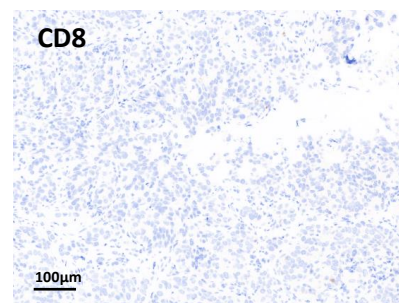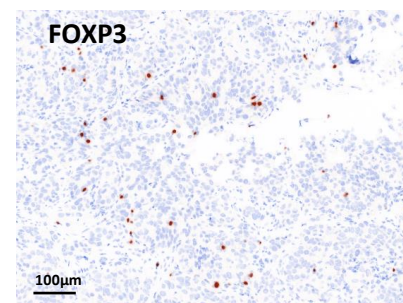

D

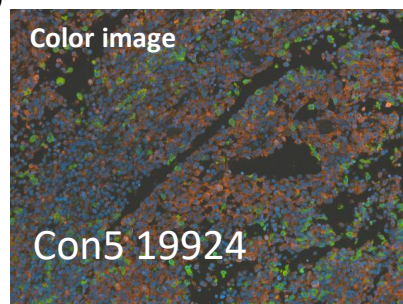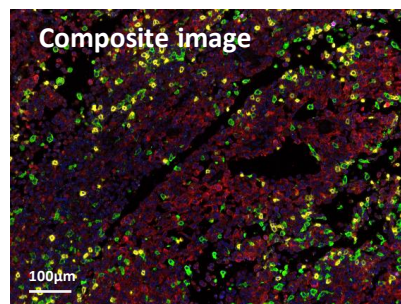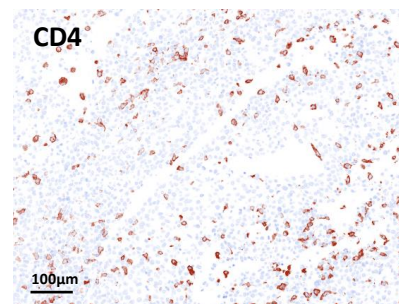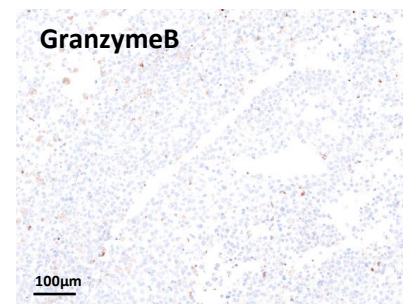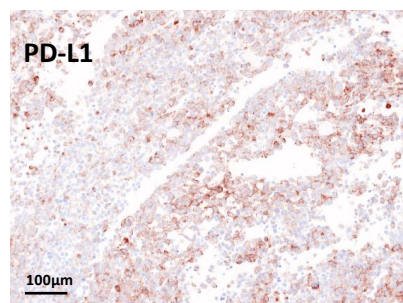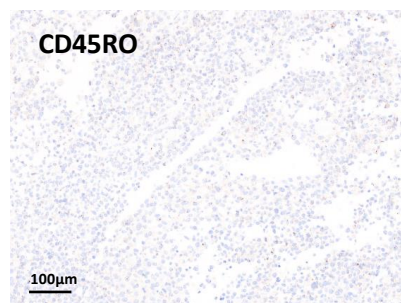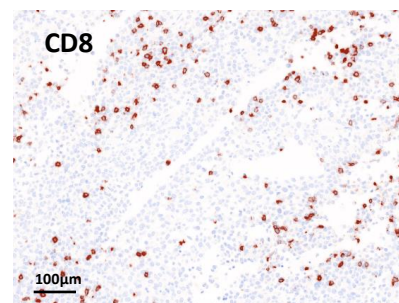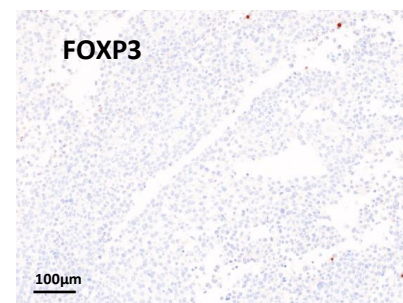



# E

# E

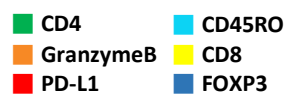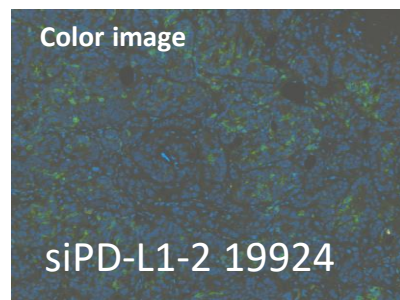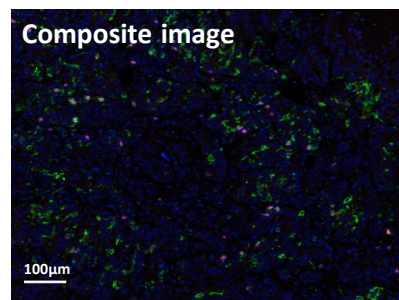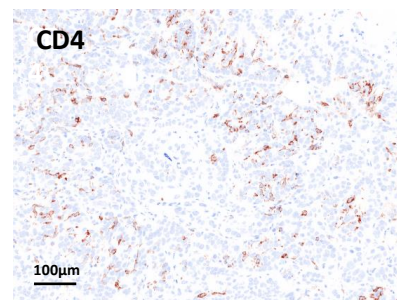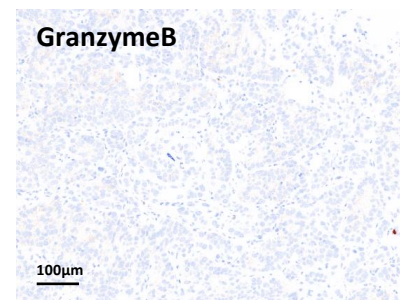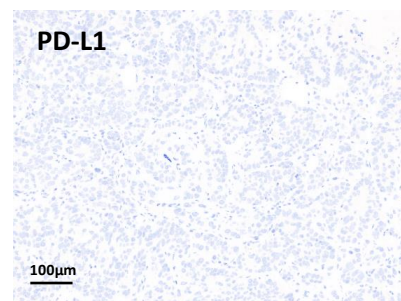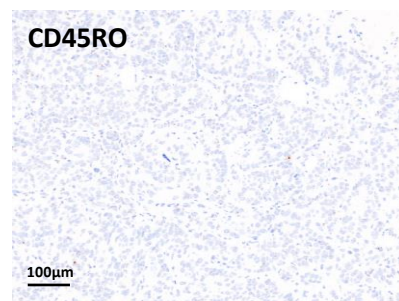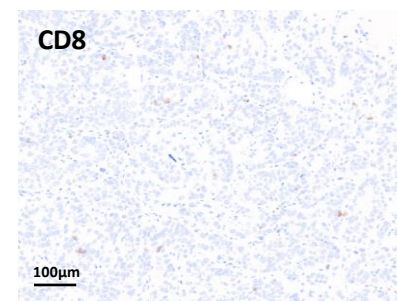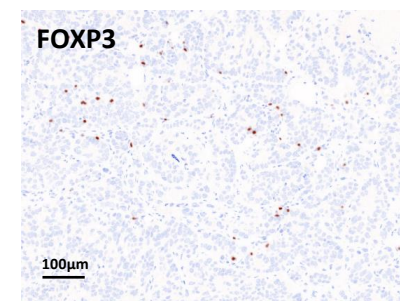

**F**

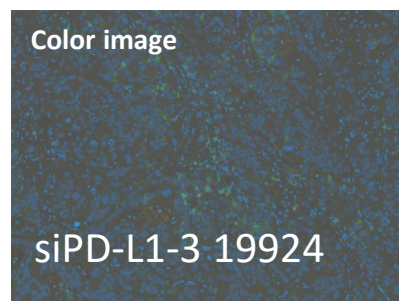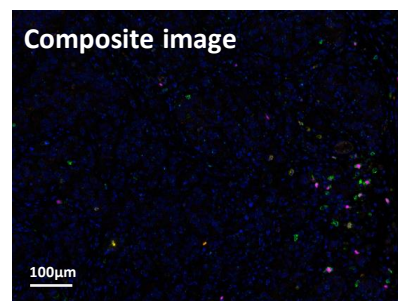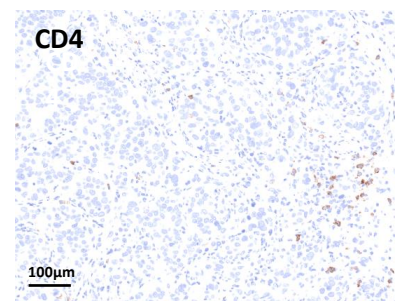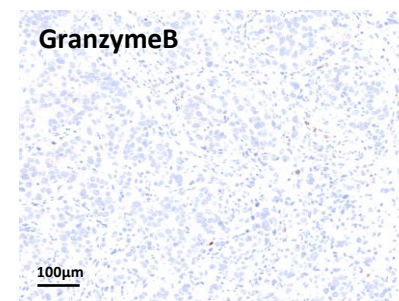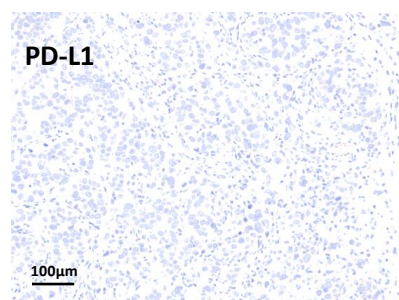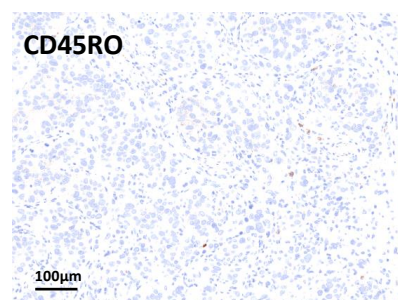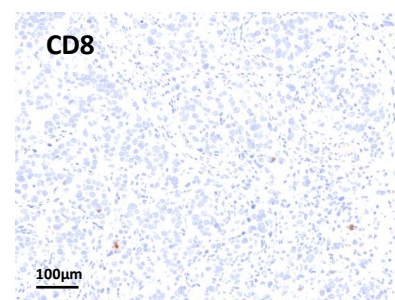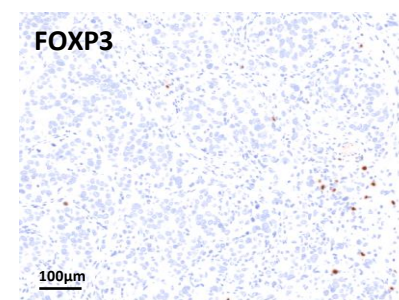



Supplementary Figure 5

G

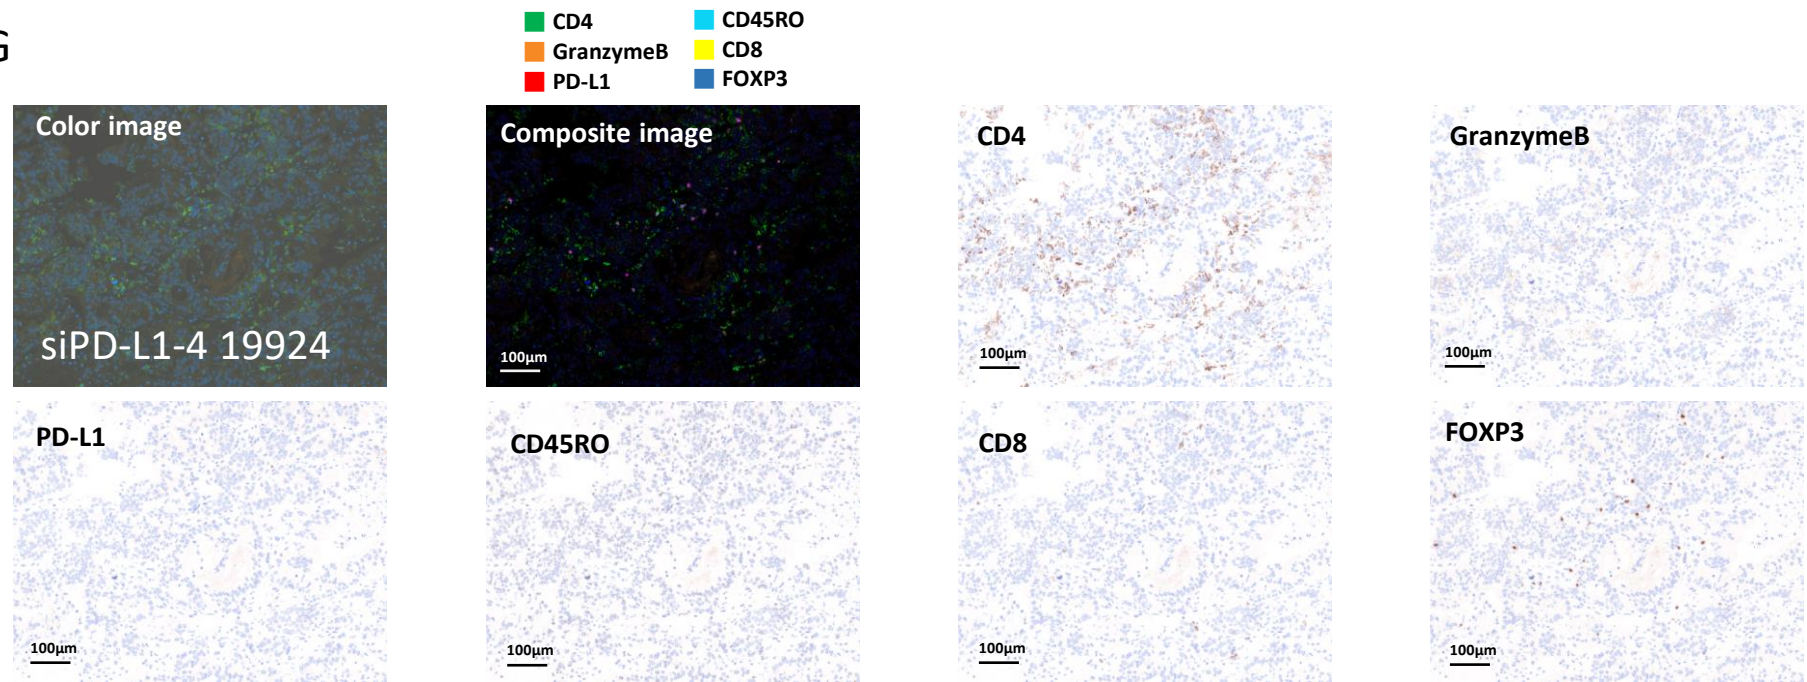

H

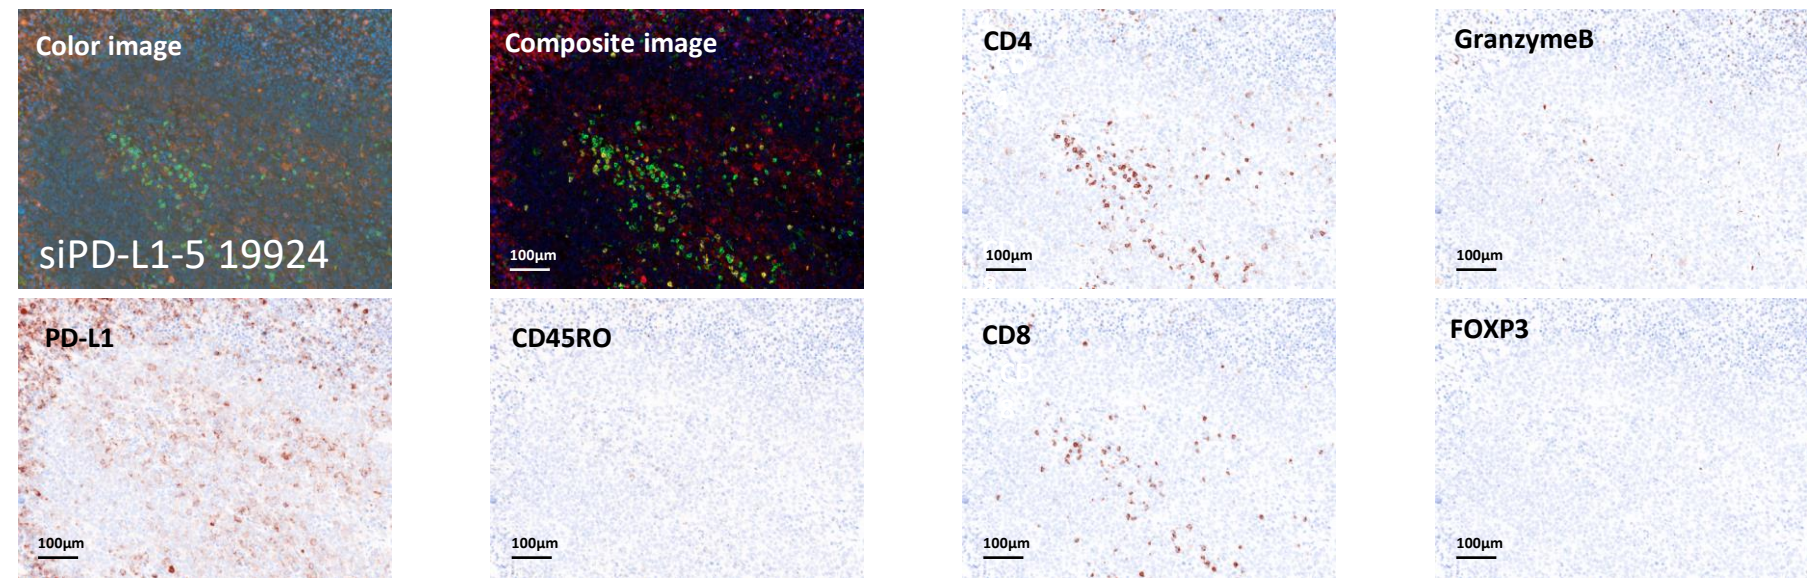

Supplementary Figure 6

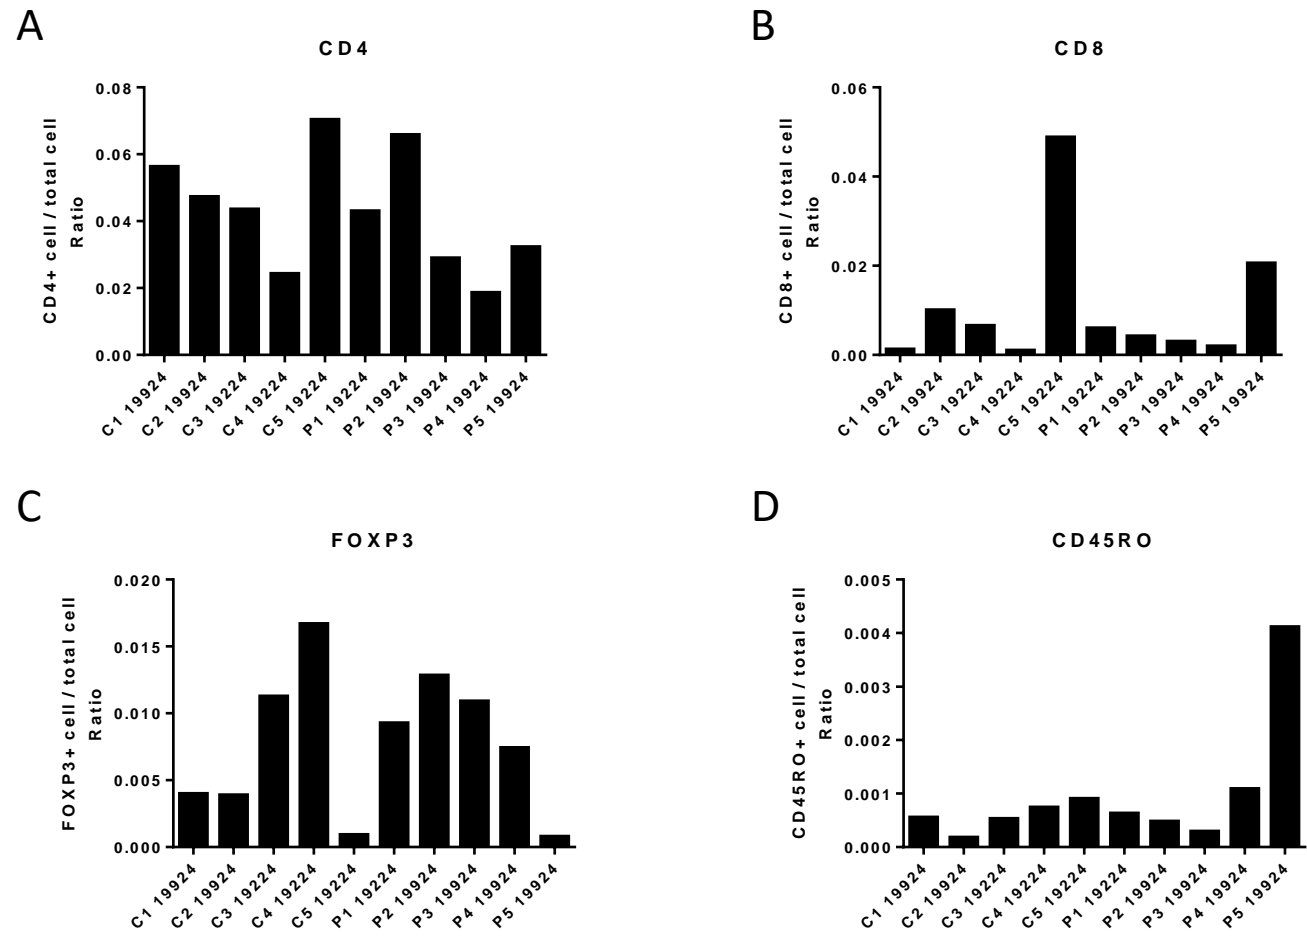

**Figure S6.** The ratio of infiltrated immune cells in the individual PDAC tumors. CD4(A), CD8(B), FoxP3(C) and CD45RO(D) were analyzed. C1-C5 indicate control tumors whereas P1-P5 indicate siPD-L1@PLGA treated tumors



**Supplementary Table S1.** Density of immune cells in the blood of normal NSG and humanized NSG mice. Representative flow cytometry analysis of the percentage of human hematopoietic cells (hCD45+), human T lymphocytes (hCD45+hCD3+) and human B lymphocytes (hCD45+hCD19+) in the blood of humanized normal mice

| Mouse    | Total cells (/200ul)  | hCD45+ | hCD45+<br>hCD19+   | hCD45+<br>hCD3+   |
|----------|-----------------------|--------|--------------------|-------------------|
| NSG 1    | 8.6 x 10 <sup>5</sup> | 1.1 %  | 1.0 %              | 1.0 %             |
| NSG 2    | 8.5 x 10 <sup>5</sup> | 0.9 %  | 0.4 %              | 0.7 %             |
| Hu NSG 1 | 3.8 x 10 <sup>5</sup> | 27.1%  | 21.7 %<br>(80 %)   | 4.6 %<br>(17 %)   |
| Hu NSG 2 | 3.9 x 10 <sup>5</sup> | 30.8 % | 20.6 %<br>(66.9 %) | 8.1 %<br>(26.3 %) |
